# Supplementary material
Source: PubMed Central journal article supplement (PMC3063743)
Supplement: supp_110.175851_JPET175851supplement.pdf [file supp_110.175851_JPET175851supplement.pdf]

**SUPPLEMENTAL DATA****Genistein, Resveratrol and AICAR Induce Cytochrome P450 4F2 Expression through an AMPK-dependent Pathway****Mei-Hui Hsu, Üzen Savas, Jerome M. Lasker and Eric F. Johnson****Department of Molecular and Experimental Medicine, The Scripps Research Institute, La Jolla, California 92037 (M.-H.H., U.S., and E.F.J.)  
Institute for Biomedical Research, Hackensack University Medical Center, Hackensack, New Jersey 07601 (J/M.L.)****Running Title: AMPK regulation of CYP4F2****Address correspondence to: Eric F. Johnson, Department of Molecular and Experimental Medicine, Mail Drop MEM255, The Scripps Research Institute, 10550 N. Torrey Pines Road, La Jolla, CA 92037; Tel. 858-784-7918; Fax. 858-784-7978; E-Mail: johnson@scripps.edu****Table of Content**

| <b>Table</b> | <b>Title</b>                               | <b>Page</b> |
|--------------|--------------------------------------------|-------------|
| <b>S1</b>    | <b>PCR primer sets used in this study.</b> | <b>2</b>    |

  

| <b>Figure</b> | <b>Title</b>                                                                                                                                                                | <b>Page</b> |
|---------------|-----------------------------------------------------------------------------------------------------------------------------------------------------------------------------|-------------|
| <b>S1.</b>    | <b>Immunoreactivity of P450 4F2/3 antibody.</b>                                                                                                                             | <b>3</b>    |
| <b>S2</b>     | <b>Actinomycin D (A) and 5-iodotubercidin (B) inhibit the AICAR stimulated PPIA normalized <i>CYP4F2</i> mRNA expression in HepG2 cells.</b>                                | <b>4</b>    |
| <b>S3</b>     | <b>AMPK activators increase the phosphorylation of Acetyl-CoA carboxylase.</b>                                                                                              | <b>5</b>    |
| <b>S4</b>     | <b>Compound C, an AMPK inhibitor, blockes stimulation of PPIA normalized small heterodimer partner (SHP) mRNA expression by genistein, resveratrol, AICAR and A-769662.</b> | <b>6</b>    |
| <b>S5</b>     | <b>Effect of siRNAs on the expression of PPIA normalized mRNA expression in HepG2 cells.</b>                                                                                | <b>7</b>    |
| <b>S6</b>     | <b>Stimulation of PPIA normalized <i>CYP4F2</i> mRNA expression by genistein is independent of SIRT1 activation.</b>                                                        | <b>8</b>    |
| <b>S7</b>     | <b>Genistein increases PPIA normalized <i>CYP4F2</i> mRNA expression independently of estrogen receptors.</b>                                                               | <b>9</b>    |
| <b>S8</b>     | <b>Effect of 25-hydroxycholesterol on SREBP target gene expression in HepG2 cells.</b>                                                                                      | <b>10</b>   |

**TABLE S1 PCR primer sets used in this study.**

| <u>Gene</u>        | <u>Oligonucleotide(5' to 3')</u> | <u>Accession #</u> | <u>Location(bp)</u> |
|--------------------|----------------------------------|--------------------|---------------------|
| CYP4F2             | CACCATGAGATCCTCCTGCATATT         | NM_001082.3        | 756-779             |
|                    | TCTCTTTAGGCTCACGGTCCTTCA         |                    | 1135-1158           |
| CYP4F3             | CACCAGCAGATCCTCCTGTACATA         | NM_000896          | 756-779             |
|                    | TCTCTTTAGGCTCACGGTCCTTCA         |                    | 1158-1135           |
| CYP4F11            | ATACCACCTTGCAAAGCACC             | NM_021187          | 1481-1500           |
|                    | TGGGTGGGTAGGACAGTCACT            |                    | 2029-2049           |
| CYP4F12            | GCTGCCATTGCACCCAAGGATAAT         | NM_023944          | 404-427             |
|                    | ACAGAAAGTCCATGTGCTGGAGGA         |                    | 777-800             |
| hAMPK $\alpha$ 1   | TTGCGTGTACGAAGGAAGAA             | NM_006251.5        | 1333-1352           |
|                    | CCTTGAGCCTCAGCATCTGAA            |                    | 1547-1527           |
| hAMPK $\alpha$ 2   | GGCAATTACGTGAAAATGAGC            | NM_006252          | 1413-1433           |
|                    | GGTGAAACTGAAGACAATGTGCTT         |                    | 1660-1630           |
| hPPIA <sup>a</sup> | CCATCTATGGGGAGAAATTTGA           | NM_021130          | 274-295             |
|                    | GAGTTGTCCACAGTCAGCAATG           |                    | 536-515             |
| hHMGR              | GGCTGGGAGCATAGGAGGCTAC           | NM_000859          | 2276-2297           |
|                    | TCTTGGTGCAAGCTCCTTGGAG           |                    | 2685-2706           |
| hLDLR              | CCTGCAAGGCTGTGGGCTCC             | NM_000527          | 1340-1359           |
|                    | GCCCTTGGCTTGGAGCCGTT             |                    | 1711-1730           |
| hSHP               | GAAGATTCTGCTGGAGGAGCCC           | NM_021969          | 386-407             |
|                    | GTCACCTGAGCAAAAGCATGTCC          |                    | 782-804             |

<sup>a</sup> HMGR, HMG-CoA reductase; LDLR, low density lipoprotein receptor; PPIA, cyclophilin A; SHP, small heterodimer partner

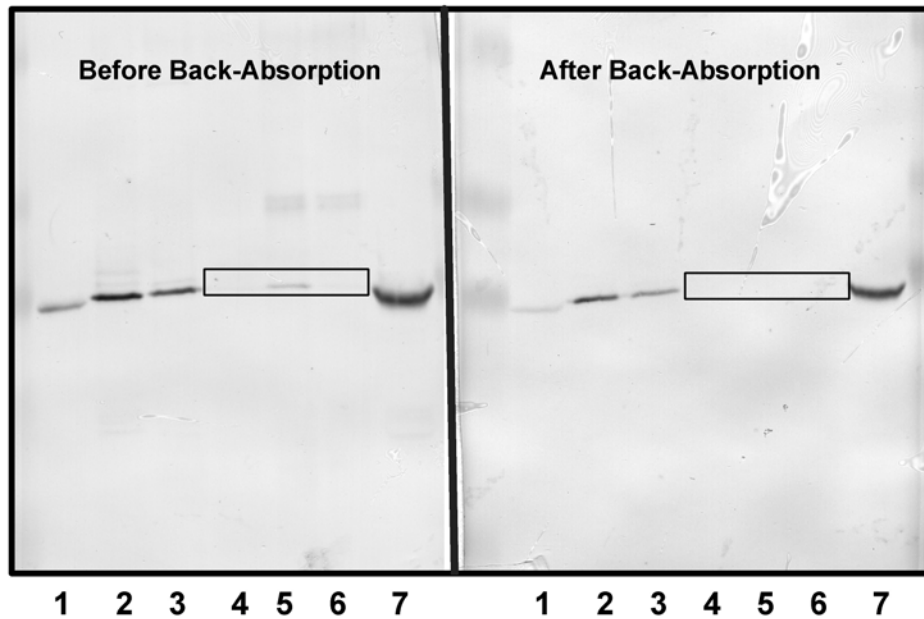

**Figure S1. Immunoreactivity of P450 4F2/3 antibody.**

Human liver microsomes and recombinant human CYP4F2, CYP4F11 and CYP4F12 *Sf9* lysates were prepared as described in "Methods" and subjected to immunoblotting with anti-human P450 4F2/3 IgG. Blot lane identification: 1= human liver microsomes, UP878, 15.0  $\mu$ g; 2 = 4F2 *Sf9* lysates, 0.5  $\mu$ g; 3 = 4F3B *Sf9* lysates, 0.5  $\mu$ g; 4 = 4F11 *Sf9* lysates, 0.5  $\mu$ g; 5 = 4F12 *Sf9* lysates, 1.0  $\mu$ g; 6 = mixture of 4F12 and 4F11 *Sf9* lysates, 1.0  $\mu$ g; and 7 = human liver microsomes, UC8911, 15.0  $\mu$ g. The immunoblot was developed using immunochemical staining. The left blot shows that anti-P450 4F2/3 IgG does not exhibit extensive cross-reactivity with either P450 4F11 and/or P450 4F12.

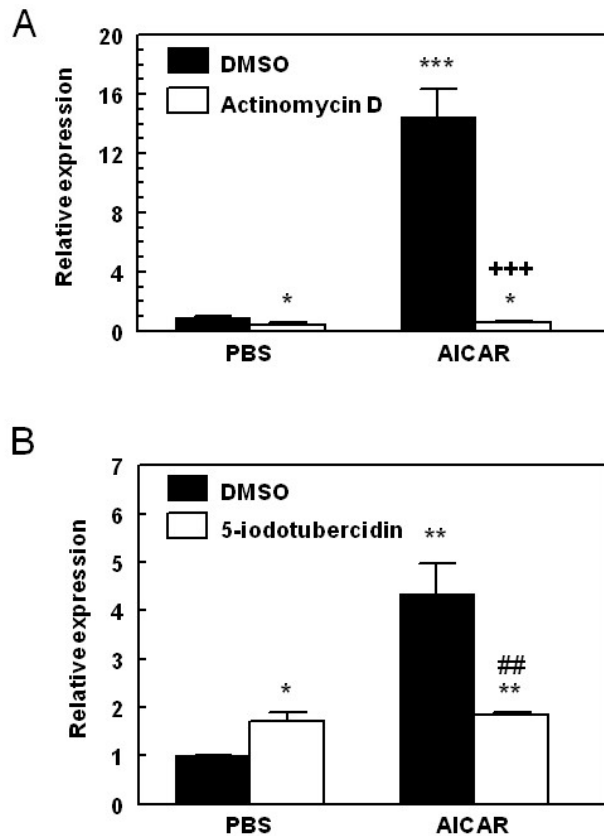

**Figure S2. Actinomycin D (A) and 5-iodotubercidin (B) inhibit the AICAR stimulated PPIA normalized *CYP4F2* mRNA expression in HepG2 cells.**

(Panel A) Actinomycin D, an inhibitor of gene transcription, was added with 0.5 mM AICAR at a final concentration of 5  $\mu$ g/ml. (Panel B) 5-iodotubercidin, a thymidine kinase inhibitor which inhibits the conversion of AICAR to ZMP, was administered with 0.5 mM AICAR to HepG2 cells at 10  $\mu$ M final concentration. Total RNA was isolated for qPCR to assess *CYP4F2* and PPIA mRNA expression levels after a 24 h drug treatment. The *CYP4F2* mRNA levels were normalized to PPIA mRNA levels. For each independent experiment, triplicate samples were used for each treatment and triplicate determinations were performed for each sample. For each individual experiment, the fold change was determined by comparison to the mean value obtained from cells treated with vehicle controls which was set as 1. Means and standard errors were determined from three independent experiments. Statistically significant differences compared to vehicle controls are depicted by the asterisks, \*:  $p < 0.05$ , \*\*:  $p < 0.01$ , \*\*\*:  $p < 0.001$ ; +++: significant difference between PBS and actinomycin D in the presence of AICAR,  $p < 0.001$ , ##: significant difference between DMSO and 5-iodotubercidin treatments in the presence of AICAR,  $p < 0.01$ .

**A**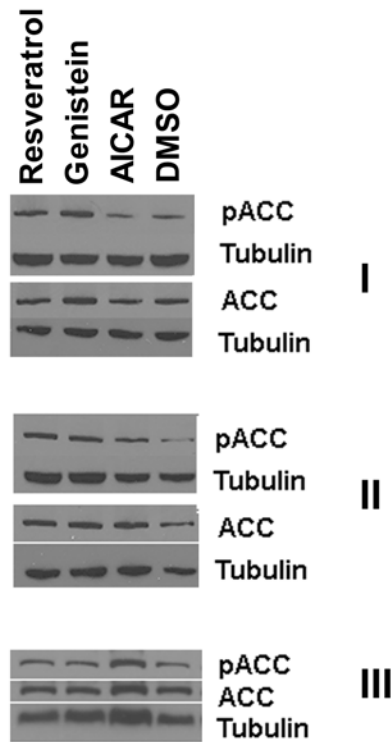**B**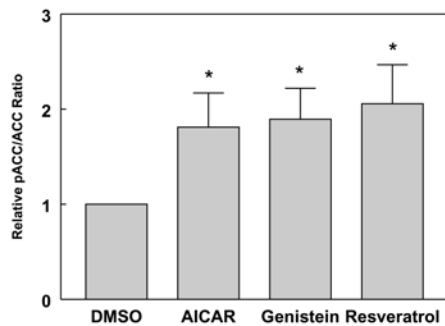

expressed as relative pACC/ACC ratio. The means and standard errors were determined from these three independent experiments shown in panel A. Statistically significant differences from DMSO controls are indicated as: \*,  $p < 0.05$ .

### Figure S3. AMPK activators increase the phosphorylation of Acetyl-CoA carboxylase.

Whole cell lysates (50  $\mu$ g) from HepG2 cells treated with genistein (100  $\mu$ M), resveratrol (75  $\mu$ M), AICAR (0.5 mM) or DMSO for 2 h were prepared as described (Nystrom and Lang, 2008). PhosphoSTOP™ phosphatase inhibitor cocktail and Complete™ protease inhibitor cocktail (Roche Applied Science) were also included during the preparation of lysates. Immunoblotting was performed using 10% NuPAGE Bis-Tris gels (Invitrogen). Nitrocellulose membranes were incubated with anti-phospho-Ser<sup>79</sup> acetyl-CoA carboxylase 1 (pACC), anti-total ACC (ACC) and anti- $\beta$ -tubulin (Tubulin) antibodies overnight at 4°C according to the manufacturer's instructions. After reaction with peroxidase-conjugated anti-rabbit IgG, the blots were developed using chemiluminescence (Western Lightening Plus, Perkin Elmer, Boston, MA). Three independent biological experiments were performed, and the x-ray films of the immunoblots are shown in panel A. X-ray films of the immunoblots were scanned, and the signals were analyzed with ImageQuant 5.2 software (GE Healthcare, Piscataway, NJ), and the results are shown in panel B. For experiment I and II, pACC and total ACC immunoblot analysis was performed on separate membranes. pACC and ACC signals were first normalized against that of tubulin. The ratio of pACC/ACC was then determined by comparing the tubulin normalized pACC over the tubulin normalized ACC. For experiment III, the pACC and total ACC immunoanalysis was performed on the same membrane. The ratio of pACC/ACC was determined by comparing the immunoreactive intensity of pACC over that of ACC. The ratio of pACC/ACC from the HepG2 cells treated with test compounds were compared to the corresponding DMSO controls, and are

### Reference

Nystrom GJ and Lang CH (2008) Sepsis and AMPK Activation by AICAR Differentially Regulate FoxO-1, -3 and -4 mRNA in Striated Muscle. *Int J Clin Exp Med* 1:50-63.

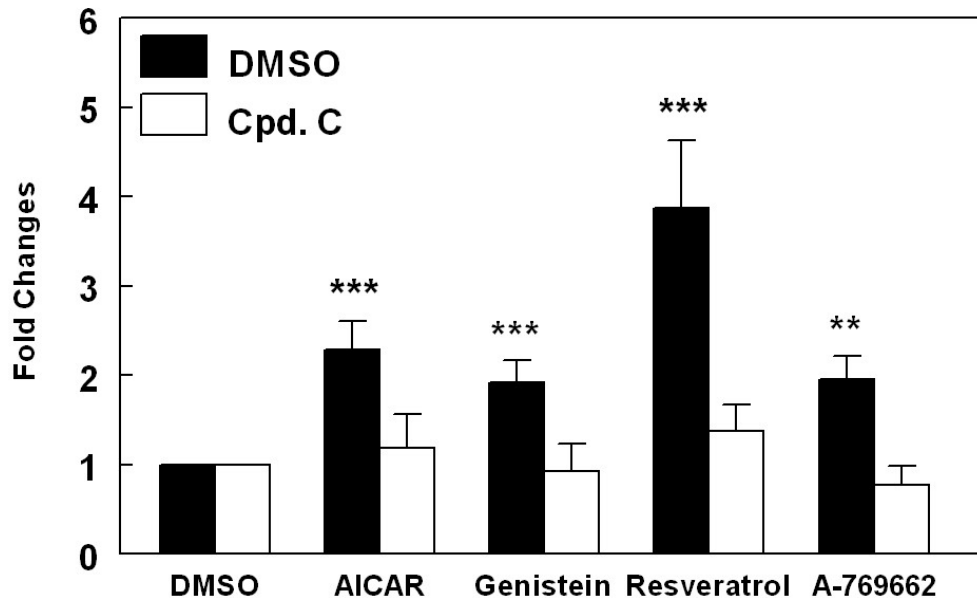

**Figure S4. Compound C, an AMPK inhibitor, blocks stimulation of PPIA normalized small heterodimer partner (SHP) mRNA expression by genistein, resveratrol, AICAR and A-769662.**

HepG2 cells were pretreated with compound C (10  $\mu$ M) or DMSO for 30 min prior to addition of genistein (100  $\mu$ M), resveratrol (75  $\mu$ M), AICAR (0.5mM), A-769662 (50  $\mu$ M) or DMSO. Total RNA was isolated for qPCR to assess SHP and PPIA mRNA expression levels after a 4 h drug treatment. The SHP mRNA levels were normalized to PPIA mRNA levels. For each of three independent biological experiments, triplicate samples were used for each treatment and triplicate determinations were performed for each sample. For each individual experiment, the fold change was determined by comparison to the mean value obtained from cells treated with controls which was set as 1. Means and standard errors were determined from three independent biological replicates. Statistically significant differences compared to controls are depicted by the asterisks, \*\*:  $p < 0.01$ , \*\*\*:  $p < 0.001$ .

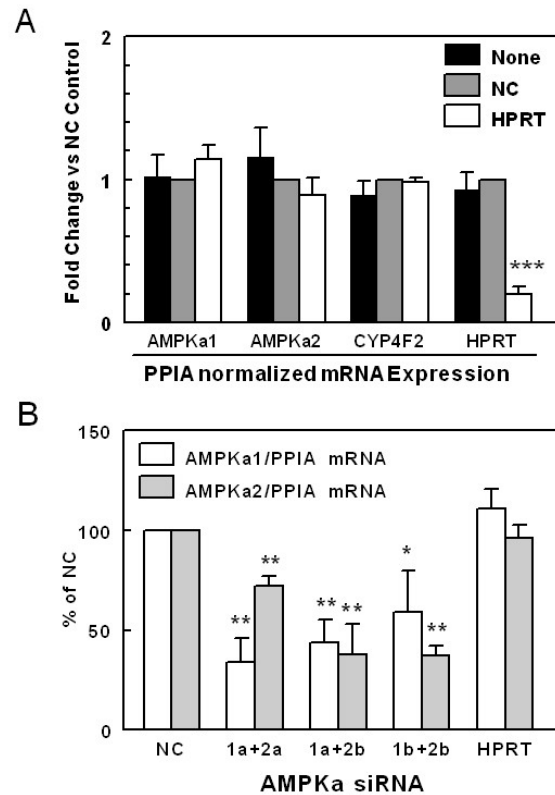

**Figure S5. Effect of siRNAs on the expression of PPIA normalized mRNA expression in HepG2 cells.**

(Panel A) HepG2 cells were transfected with a siRNA targeting HPRT (HPRT), a non-targeting/scrambled siRNA control (NC) or no siRNA (None) as described in “Methods”. Twenty four hours later, the culture media was replaced with fresh media. Cells were harvested for total RNA isolation after another 24 h. All siRNAs were used at a final concentration of 10 nM. The PPIA normalized AMPK $\alpha$ 1, AMPK $\alpha$ 2, CYP4F2 and HPRT mRNA expression was expressed relative to the PPIA normalized mRNA expression in the scrambled siRNA control (NC), which is set as 1 in the same experiment. Means and standard errors were determined from at least three independent experiments. After 48 h of transfection, HPRT siRNA reduced the corresponding PPIA normalized HPRT mRNA levels by 80% relative to the scrambled siRNA controls (NC) (statistically significant at  $p < 0.001$ , \*\*\*). No significant difference in the expression of HPRT was found between mock-transfected and cells transfected with NC siRNA. No significant difference in the expression of AMPK $\alpha$ 1,  $\alpha$ 2 and CYP4F2 was seen between the cells transfected with NC siRNA and the cells without siRNA or HPRT siRNA. (Panel B) HepG2 cells were co-transfected with both AMPK $\alpha$ 1 (1) and AMPK $\alpha$ 2 (2) siRNAs as described in “Methods”. For each AMPK $\alpha$  isoform, two different siRNAs (a or b) were used. Twenty four hours later, the culture media was replaced with fresh media containing 0.5 mM AICAR or PBS. Cells were harvested for total RNA isolation after another 24 h. All siRNAs were used at a final concentration of 10 nM. The effect of AMPK $\alpha$  siRNA knockdown on PPIA normalized AMPK $\alpha$ 1 and AMPK $\alpha$ 2 mRNA expression was determined by comparing the expression of PPIA normalized AMPK $\alpha$ 1 and AMPK $\alpha$ 2 in the scrambled siRNA control (NC), which is set as 100%, in the same experiment. Means and standard errors were determined from at least three independent experiments. Statistically significant differences between NC and AMPK or HPRT targeting siRNAs are indicated as: \*,  $p < 0.05$ ; \*\*,  $p < 0.01$ .

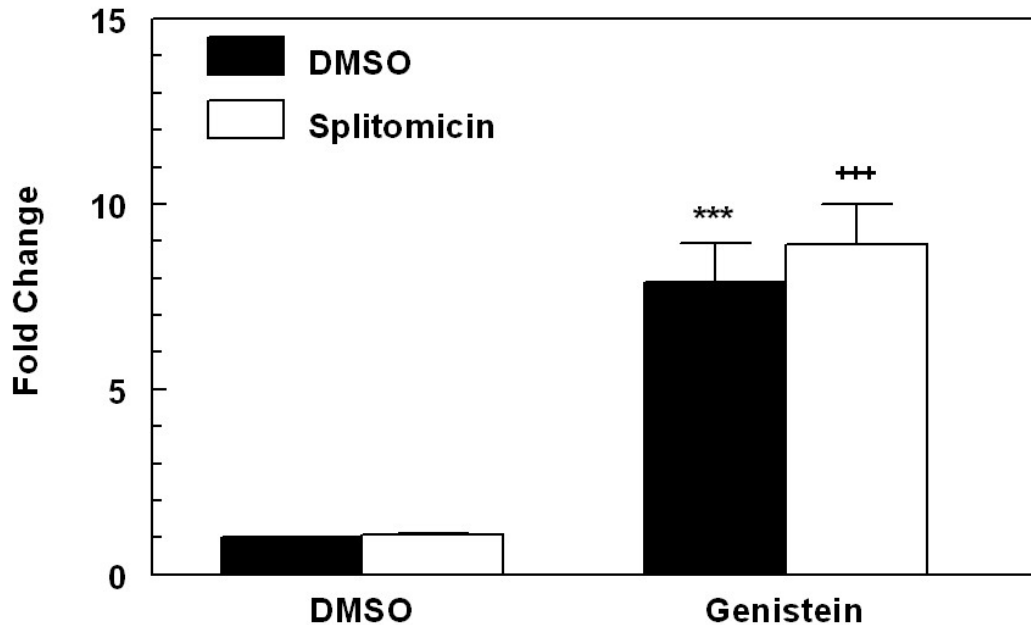

**Figure S6. Stimulation of PPIA normalized *CYP4F2* mRNA expression by genistein is independent of SIRT1 activation.**

HepG2 cells were pretreated with 100  $\mu$ M splitomicin (a SIRT1 inhibitor) for 24 h, and then 100  $\mu$ M genistein was added to the culture medium. After a 24-h genistein treatment, the cells were harvested for total RNA isolation and qPCR analysis. The *CYP4F2* mRNA levels were normalized to PPIA mRNA levels. For each independent experiment, triplicate samples were used for each treatment and triplicate determinations were performed for each sample. For each individual experiment, the fold change was determined by comparison to the mean value obtained from the cells treated with the vehicle control which was set as 1. Means and standard errors were determined from three independent experiments. Statistically significant differences between DMSO and treatments are indicated as, \*\*\*:  $p < 0.001$ ; +++: significant difference between DMSO and genistein treatments in the presence of splitomicin,  $p < 0.001$ .



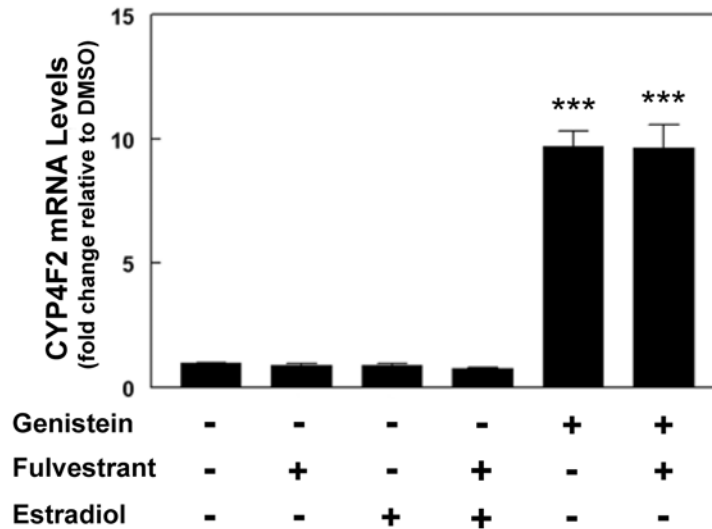

**Figure S7. Genistein increases PPIA normalized *CYP4F2* mRNA expression independently of estrogen receptors.** HepG2 cells were pretreated with 1  $\mu$ M fulvestrant (an estrogen receptor antagonist) or DMSO for 1 h before a 24 h treatment with genistein (100  $\mu$ M) or 17 $\beta$ -estradiol (0.1  $\mu$ M, an estrogen receptor agonist) or DMSO. Total RNA was isolated and subjected to qPCR to assess *CYP4F2* and PPIA mRNA expression levels. The *CYP4F2* mRNA levels were normalized to PPIA mRNA levels. For each independent experiment, triplicate samples were used for each treatment and triplicate determinations were performed for each sample. For each individual experiment, the fold change was determined by comparison to the mean value obtained from the cells treated with DMSO which was set as 1. Means and standard errors were determined from three independent experiments. Statistically significant differences between DMSO and drug treatments are shown, \*\*\*:  $p < 0.001$ .

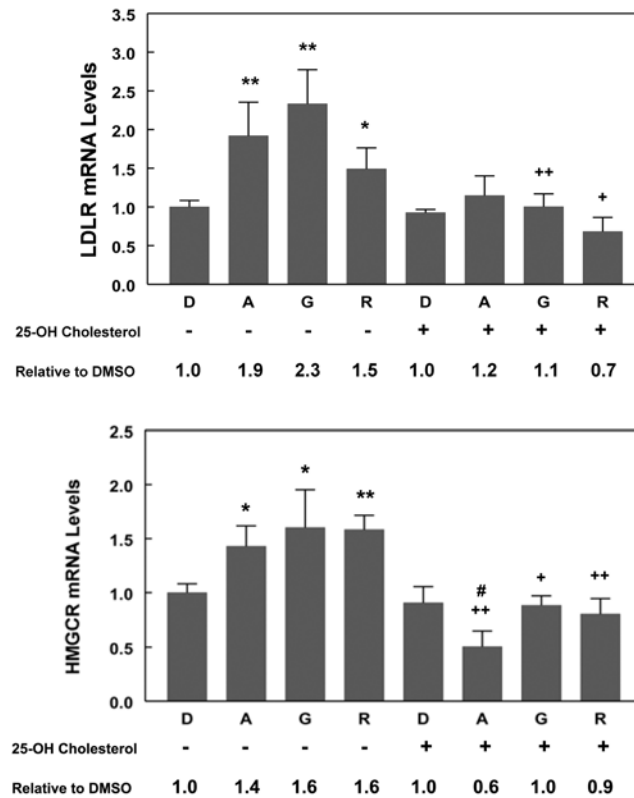

**Figure S8. Effect of 25-hydroxycholesterol on SREBP target gene expression in HepG2 cells.**

HepG2 cells were incubated with 25-hydroxycholesterol (25-OH cholesterol) (5  $\mu$ g/ml) or vehicle control (DMSO, D) together with 0.5 mM AICAR (A), 100  $\mu$ M genistein (G), or 75  $\mu$ M resveratrol (R) for 24 h in culture medium containing 10% fetal bovine serum. Total RNA was isolated and qPCR employed to assess low density lipoprotein receptor (LDLR), HMG-CoA reductase (HMGCR) and PPIA mRNA expression. The LDLR (upper panel) and HMGCR (lower panel) mRNA levels were normalized to PPIA mRNA levels. For each independent experiment, triplicate samples were used for each treatment and triplicate determinations were performed for each sample. For each individual experiment, the fold change was determined by comparison to the mean value obtained from the cells treated with DMSO which was set as 1. Means and standard errors were determined from three independent experiments. Statistically significant differences between DMSO and treatments in the absence of 25-OH cholesterol, \*:p<0.05, \*\*: p<0.01; significant difference between treatments in the presence or absence of 25-OH cholesterol, +: p<0.05, ++: p<0.01; significant difference between DMSO and treatments in the presence of 25-OH cholesterol, #: p<0.05.
